# Supplementary material for: Arts for ageing well: a propensity score matching analysis of the effects of arts engagements on holistic well-being among older Asian adults above 50 years of age
Source: PubMed Central journal article supplement — BMJ Open. 2019 Nov 21;9(11):e029555. doi: 10.1136/bmjopen-2019-029555 (PMC6887024; doi:10.1136/bmjopen-2019-029555), 2019-11-21
Supplement: bmjopen-2019-029555supp001.pdf [file bmjopen-2019-029555supp001.pdf]

**Table S1: Comparison of background variables between matched and unmatched samples in active and passive engagement groups**

| Variables                           | Active engagement      |                      |         | Passive engagement     |                      |         |
|-------------------------------------|------------------------|----------------------|---------|------------------------|----------------------|---------|
|                                     | Unmatched<br>(n = 619) | Matched<br>(n = 444) | P-value | Unmatched<br>(n = 333) | Matched<br>(n = 730) | P-value |
| Age (years)                         | 66.4 ± 10.6            | 61.2 ± 8.3           | <0.001  | 66.4 ± 11.1            | 63.2 ± 9.4           | <0.001  |
| Sex                                 |                        |                      | <0.001  |                        |                      | 0.173   |
| Male                                | 308 (49.8)             | 170 (38.3)           |         | 160 (48.1)             | 318 (43.6)           |         |
| Female                              | 311 (50.2)             | 274 (61.7)           |         | 173 (51.9)             | 412 (56.4)           |         |
| Marital Status                      |                        |                      | 0.001   |                        |                      | 0.037   |
| Single                              | 147 (23.7)             | 68 (15.3)            |         | 80 (24.0)              | 135 (18.5)           |         |
| Married                             | 472 (76.3)             | 376 (84.7)           |         | 253 (76.0)             | 595 (81.5)           |         |
| Educational status                  |                        |                      | <0.001  |                        |                      | <0.001  |
| No Formal Education                 | 110 (17.8)             | 15 (3.4)             |         | 57 (17.1)              | 68 (9.3)             |         |
| Elementary school                   | 341 (55.1)             | 210 (47.3)           |         | 176 (52.9)             | 375 (51.4)           |         |
| High school or Higher               | 168 (27.1)             | 219 (49.3)           |         | 100 (30.0)             | 287 (39.3)           |         |
| Ethnicity                           |                        |                      | 0.010   |                        |                      | 0.758   |
| Non-Chinese                         | 137 (22.1)             | 70 (15.8)            |         | 63 (18.9)              | 144 (19.7)           |         |
| Chinese                             | 482 (77.9)             | 374 (84.2)           |         | 270 (81.1)             | 586 (80.3)           |         |
| Religious belief                    |                        |                      | 0.351   |                        |                      | 0.498   |
| No religious belief                 | 86 (13.9)              | 53 (11.9)            |         | 47 (14.1)              | 92 (12.6)            |         |
| Have a religious belief             | 533 (86.1)             | 391 (88.1)           |         | 286 (85.9)             | 638 (87.4)           |         |
| Employment status                   |                        |                      | <0.001  |                        |                      | 0.009   |
| Unemployed/retired                  | 388 (62.6)             | 219 (49.3)           |         | 213 (64.0)             | 394 (54.0)           |         |
| Part time employment                | 61 (9.9)               | 86 (19.4)            |         | 39 (11.7)              | 108 (14.8)           |         |
| Full time/ self-employed            | 170 (27.5)             | 139 (31.3)           |         | 81 (24.3)              | 228 (31.2)           |         |
| Monthly household income (SGD)      |                        |                      | 0.001   |                        |                      | 0.004   |
| <1,000                              | 164 (26.5)             | 86 (19.4)            |         | 96 (28.8)              | 154 (21.1)           |         |
| 1,000 - 2,999                       | 197 (31.8)             | 124 (27.9)           |         | 106 (31.8)             | 215 (29.5)           |         |
| >3,000                              | 258 (41.7)             | 234 (52.7)           |         | 131 (39.4)             | 361 (49.4)           |         |
| Housing type                        |                        |                      | <0.001  |                        |                      | 0.099   |
| 1-2 room HDB flat                   | 55 (8.9)               | 14 (3.2)             |         | 29 (8.7)               | 40 (5.5)             |         |
| 3-4 room HDB flat                   | 389 (62.8)             | 226 (50.9)           |         | 194 (58.3)             | 421 (57.7)           |         |
| 5 room HDB flat and others          | 175 (28.3)             | 204 (45.9)           |         | 110 (33.0)             | 269 (36.8)           |         |
| Physical activity level (hours)     |                        |                      |         |                        |                      |         |
| Light intensity (mean ± s.d.)       | 4.1 ± 7.4              | 6.9 ± 11.3           | 0.0002  | 4.6 ± 9.4              | 5.6 ± 9.3            | 0.023   |
| Moderate intensity (mean ± s.d.)    | 1.7 ± 5.7              | 2.5 ± 6.6            | 0.0001  | 1.6 ± 5.2              | 2.2 ± 6.5            | 0.005   |
| Vigorous intensity (mean ± s.d.)    | 0.2 ± 0.8              | 0.3 ± 1.2            | 0.015   | 0.2 ± 0.9              | 0.3 ± 1.0            | 0.009   |
| Strength and balance (mean ± s.d.)  | 0.6 ± 1.6              | 0.8 ± 1.4            | 0.010   | 0.6 ± 1.9              | 0.7 ± 1.3            | 0.105   |
| All physical activity (mean ± s.d.) | 6.6 ± 10.6             | 10.5 ± 14.4          | <0.001  | 7.1 ± 12.1             | 8.8 ± 12.6           | 0.0002  |
